# Supplementary material for: Plasmon-induced strong interaction between chiral molecules and orbital angular momentum of light
Source: PubMed Central journal article supplement (PMC4677297; doi:10.1038/srep18003), 2015-12-14
Supplement: srep18003-s1.pdf [file srep18003-s1.pdf]

## Supplementary materials

# Plasmon-induced strong interaction between chiral molecules and orbital angular momentum of light

Tong Wu, Rongyao Wang and Xiangdong Zhang

### 1 OAM BEAM IN APLANATIC SYSTEM

In this section, we give expressions of  $\mathbf{E}_{inc\pm}^{(\pm l)}$  for the OAM beam in the aplanatic system. The OAM beam  $\mathbf{E}_{inc0}^{(l)}(\rho, \varphi, z) = |E_{inc}^{(l)}(\rho, \varphi)| e^{ik_z z} (p_x \mathbf{e}_x + p_y \mathbf{e}_y)$  with LG mode focused by an object with a numerical aperture of NA can be expressed by using the vectorial Debye theory<sup>[S1-3]</sup>,

$$\mathbf{E}_{inc+}^{(l)}(r, \theta, \phi) = \int_{\alpha=0}^{\alpha_{\max}} \int_{\beta=0}^{2\pi} \sum_{\sigma=\pm} \tilde{\mathbf{E}}_{\sigma}^{(l)}(\alpha, \beta) e^{ikr[\sin\alpha \sin\theta \cos(\beta-\phi) + \cos\alpha \cos\theta]} k^2 \cos\alpha \sin\alpha \mathbf{d}\alpha \mathbf{d}\beta, \quad (\text{S1-1})$$

where  $\tilde{\mathbf{E}}_{\sigma}^{(l)}(\alpha, \beta)$  represents the amplitude of the Fourier plane-wave spectrum, which can be written as

$$\tilde{\mathbf{E}}_{\sigma}^{(l)}(\alpha, \beta) = \frac{ikfe^{-ikf}}{2\pi k^2 \cos\alpha} E_{\sigma}^{(l)}(\alpha, \beta) \left( \frac{\mathbf{e}_{\alpha} + i\sigma \mathbf{e}_{\beta}}{\sqrt{2}} \right), \quad (\text{S1-2})$$

and

$$E_{\sigma}^{(l)}(\alpha, \beta) = \frac{1}{\sqrt{2}} |E_{inc}^{(l)}(f \sin\alpha, \beta)| \sqrt{\frac{n_1}{n_2}} \cos^{1/2} \alpha [v \mp i\sigma u], \quad (\text{S1-3})$$

$$|E_{inc}^{(l)}(\rho, \varphi)| = \left[ \frac{\sqrt{2}\rho}{\omega_0} \right]^{|l|} \exp\left[ -\frac{\rho^2}{\omega_0^2} \right] L_p^{|l|} \left( -\frac{\rho^2}{\omega_0^2} \right) e^{il\varphi}, \quad (S1-4)$$

$$v = [p_y \sin \beta + p_x \cos \beta], \quad (S1-5)$$

$$u = [p_y \cos \beta - p_x \sin \beta]. \quad (S1-6)$$

Here  $k_z$  is the z component of the wave vector,  $(p_x, p_y) = (1, 0)$  or  $(0, 1)$  describe linearly-polarized beams, and  $(p_x, p_y) = (1, \pm i)$  represents, respectively, left-circularly and right-circularly polarized beam. Here  $f$  is the focal distance of lens while  $\omega_0$  is the beam waist radius before focusing,  $\alpha_{\max}$  is related to the numerical aperture through  $NA = n_2 \sin \alpha_{\max}$ ,  $n_1$  and  $n_2$  are the refractive indices in the object and imagine regions, respectively.  $L_p^l(x)$  is the associated Laguerre polynomials. At the same time  $\mathbf{e}_\beta = -\sin \beta \mathbf{e}_x + \cos \beta \mathbf{e}_y$ , and  $\mathbf{e}_\alpha = \cos \alpha \cos \beta \mathbf{e}_x + \cos \alpha \sin \beta \mathbf{e}_y - \sin \alpha \mathbf{e}_z$ . The field is now expanded into series of VSFs as the form given by the following relation:

$$\mathbf{E}_{inc+}^{(l)}(\mathbf{r}) = \sum_{v=1}^{\infty} a_{v+}^{(l)} \mathbf{M}_v^{(1)}(k(\mathbf{r} - \mathbf{r}_d)) + b_{v+}^{(l)} \mathbf{N}_v^{(1)}(k(\mathbf{r} - \mathbf{r}_d)). \quad (S1-7)$$

The  $\mathbf{M}_v^{(1)}$  and  $\mathbf{N}_v^{(1)}$  are VSFs of the first kind whose definition can be found in ref S4. Here  $\mathbf{r}_d = (\rho_0 \cos \phi_0, \rho_0 \sin \phi_0, z_0)$  is the position of the chiral molecule, and the expansion coefficients should be written as<sup>S3,S5</sup>

$$\begin{aligned} \begin{bmatrix} ia_{v+}^{(l)} \\ b_{v+}^{(l)} \end{bmatrix} &= 2\eta_f i^n e^{i(l-m)\phi_0} \left[ \gamma_{mn} \frac{n_1}{n_2} \right]^{1/2} \text{sgn}^m(1, m) \int_0^{\alpha_{\max}} d\alpha \sqrt{\cos \alpha} \sin \alpha e^{ikz_0 \cos \alpha} \mathbf{P}_{pl}(\sin \alpha) e^{-f^2 \sin^2 \alpha / \omega_0^2} \\ &\times \left\{ \begin{aligned} &\left[ \frac{(m-l)J_{m-l}(k\rho_0 \sin \alpha) \tau_{mn}(\cos \alpha)}{k\rho_0 \sin \alpha} + J'_{m-l}(k\rho_0 \sin \alpha) \tau_{mn}(\cos \alpha) \right] \begin{bmatrix} -p_x \cos \phi_0 - p_y \sin \phi_0 \\ -p_y \cos \phi_0 + p_x \sin \phi_0 \end{bmatrix} \\ &+ i \left[ \frac{(m-l)J_{m-l}(k\rho_0 \sin \alpha) \tau_{mn}(\cos \alpha)}{k\rho_0 \sin \alpha} + J'_{m-l}(k\rho_0 \sin \alpha) \tau_{mn}(\cos \alpha) \right] \begin{bmatrix} -p_x \sin \phi_0 + p_y \cos \phi_0 \\ -p_y \sin \phi_0 - p_x \cos \phi_0 \end{bmatrix} \end{aligned} \right\}. \quad (S1-8) \end{aligned}$$

with

$$\mathbf{P}_{pl}(\sin \alpha) = - \left[ \frac{\sqrt{2} f \sin \alpha}{\omega_0} \right]^{|l|} L_p^{|l|} \left( \frac{2 f^2 \sin^2 \alpha}{\omega_0^2} \right), \quad (\text{S1-9})$$

$$\pi_{mn}(\cos \alpha) = \frac{m}{\sin \theta} P_n^m(\cos \theta) \quad , \quad (\text{S1-10})$$

$$\tau_{mn}(\cos \alpha) = \frac{d}{d\theta} P_n^m(\cos \theta) \quad , \quad (\text{S1-11})$$

where  $\eta_f$  is expressed as  $\eta_f = ikf e^{-ikf}$ , and  $\gamma_{mn} = \frac{(2n+1)(n-m)!}{n(n+1)(n+m)!}$ . At the same time,

$$\pi_{mn}(\cos \alpha) = \frac{m}{\sin \theta} P_n^m(\cos \alpha) \quad \text{and} \quad \tau_{mn}(\cos \alpha) = \frac{d}{d\theta} P_n^m(\cos \alpha) \quad , \quad \text{with } P_n^m(\cos \alpha) \text{ being the}$$

associated Legendre functions.  $\mathbf{P}_{pl}(\sin \alpha)$  is a function related to the associated Laguerre polynomials, whose expression is given by

$$\mathbf{P}_{pl}(\sin \alpha) = \left[ \frac{\sqrt{2} f \sin \alpha}{\omega_0} \right]^{|l|} L_p^{|l|} \left( \frac{2 f^2 \sin^2 \alpha}{\omega_0^2} \right). \quad (\text{S1-12})$$

Without loss of generality, here we limit our discussion on x polarized waves with  $(px, py) = (1, 0)$ , and fix the beam center at the origin of the coordinate.  $\mathbf{E}_{inc-}^{(-l)}(\mathbf{r})$  is defined as the electric field which is related to  $\mathbf{E}_{inc+}^{(l)}(\mathbf{r})$  through the space inversion at  $\mathbf{r}_d$ , which is still an OAM beam but possessing a topological index of  $-l$ .

$$\mathbf{E}_{inc-}^{(-l)}(\mathbf{r}) = \left[ \hat{P} \mathbf{E}_{inc+}^{(l)} \right]. \quad (\text{S1-13})$$

Here  $\hat{P}$  is the parity operator. The minus sign in the subscript represents the direction of propagation, which is opposite with that of  $\mathbf{E}_{inc+}^{(l)}$ . If  $\mathbf{E}_{inc-}^{(-l)}(\mathbf{r})$  is expressed as form of sum of VSFs functions like Eq.(S1-7), the expansion coefficients are written as

$$a_{v-}^{(-l)} = (-1)^{n+1} a_{v+}^{(+l)}; b_{v-}^{(-l)} = (-1)^n b_{v+}^{(+l)}. \quad (\text{S1-14})$$

## 2 VALUES OF INTEGRATIONS <sup>S6</sup>

In this section, we give the expressions for  $I_1^{(ml)}, I_2^{(ml)}, I_3^{(ml)} = -I_2^{(ml)}$  and  $I_4^{(ml)}$ .

$$\begin{aligned} I_1^{(ml)} &= (m-l)^2 \int_0^\infty \frac{J_{m-l}(k\rho_0 \sin \alpha) J_{m-l}(k\rho_0 \sin \alpha')}{k^2 \rho_0^2 \sin \alpha \sin \alpha'} \rho_0 d\rho_0 \\ &= \begin{cases} \frac{1}{2k^2} (m-l) \frac{\sin^{m-l-1} \alpha}{\sin^{m-l+1} \alpha'} (\sin \alpha < \sin \alpha') \\ \frac{1}{2k^2} (m-l) \frac{\sin^{m-l-1} \alpha'}{\sin^{m-l+1} \alpha} (\sin \alpha \geq \sin \alpha') \end{cases}, \end{aligned} \quad (\text{S2-1})$$

$$I_2^{(ml)} = (m-l) \int_0^\infty \frac{J_{m-l}(k\rho_0 \sin \alpha) J'_{m-l}(k\rho_0 \sin \alpha')}{k \sin \alpha} d\rho_0 = \begin{cases} -I_1^{(ml)} & (\sin \alpha < \sin \alpha') \\ I_1^{(ml)} & (\sin \alpha \geq \sin \alpha') \end{cases}, \quad (\text{S2-2})$$

$$\begin{aligned} I_4^{(ml)} &= \int_0^\infty J'_{m-l}(k\rho_0 \sin \alpha') J'_{m-l}(k\rho_0 \sin \alpha) \rho_0 d\rho_0 \\ &= \int_0^\infty J_{m-l+1}(k\rho_0 \sin \alpha') J_{m-l+1}(k\rho_0 \sin \alpha) d\rho_0 + I_1^{(ml)} + \hat{I}_2^{(ml)} + \hat{I}_2^{(ml)}, \quad (\text{S2-3}) \\ &= \frac{1}{k \sin \alpha} \delta(k \sin \alpha - k \sin \alpha') + I_1^{(ml)} + \hat{I}_2^{(ml)} + \hat{I}_2^{(ml)}, \end{aligned}$$

## References

- [S1] Novotny, L.; Hecht, B. *Principles of Nano-Optics*, (University Press:Cambridge, 2006).
- [S2] Monteiro, P. B., Neto, P. A. M., Nussenzveig, H. M. Angular momentum of focused beams: Beyond the paraxial approximation. *Phys. Rev. A* **79**, 033830 (2009).
- [S3] Ng, J., Lin, Z., Chan, C. T. Theory of optical trapping by an optical vortex beam. *Phys. Rev. Lett.* **104**, 103601 (2010).
- [S4] Doicu, A., Wriedt, T., Eremin, Y. A. *Light Scattering by Systems of Particles*,

(Springer-Verlag, Berlin, 2006).

[S5] Alvaro, R. N. A. *et al.* Exact partial wave expansion of optical beams with respect to an arbitrary origin. *Opt. lett.*, **31**, 2477-2479 (2006).

[S6] Watson, G. N. A Treatise on the Theory of Bessel Functions, (Cambridge University Press, Cambridge, 1980).
